# Supplementary material for: Studies on the local structure of the F ∕ OH site in topaz by magic angle spinning nuclear magnetic resonance and Raman spectroscopy
Source: Copernicus journal article supplement (doi:10.5194/ejm-34-507-2022), 2022-10-25
Supplement: Supplementary file 1 [file ejm-34-507-2022-supplement.zip]

Table S1: Rietveld agreement factors (GSAS-II terminology).

| Sample | Observations | Reflections | Parameters | wR [%] | RF [%] | RF <sup>2</sup> [%] |
|--------|--------------|-------------|------------|--------|--------|---------------------|
| TopP   | 4950         | 113         | 32         | 11.24  | 3.58   | 6.98                |
| TopT   | 4950         | 114         | 32         | 15.12  | 8.44   | 17.40               |

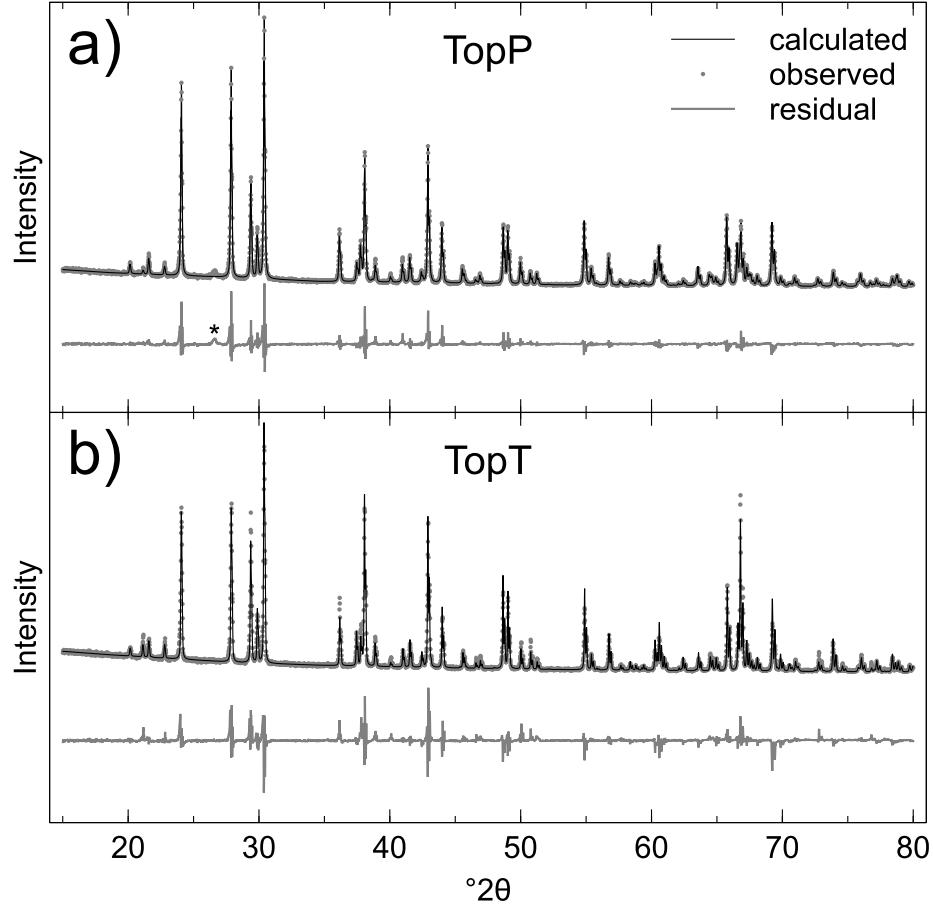

Fig. S1: Experimental XRD data, Rietveld refinement (GSAS-II software package, Toby and Von Dreele, 2013) fits and residuals of both samples. The agreement factors of the fits are listed in table S1. The asterisk in a) marks the  $26.6^\circ$   $2\theta$  peak of quartz caused by contamination from the agate ball mill in sample TopP. The differences in the positions of the individual reflections between the two samples reflect the differences in lattice parameters (see Table S1). The obvious mismatch in intensity for some reflections of sample TopT in b) indicates a preferred orientation of the powder particles. This is due to the single (001) cleavage plane of topaz and the fact that this sample was ground by hand in an alumina mortar not as finely as sample TopP in a) in order to avoid quartz contamination from the agate mill. This does not affect the determination of the lattice constants.

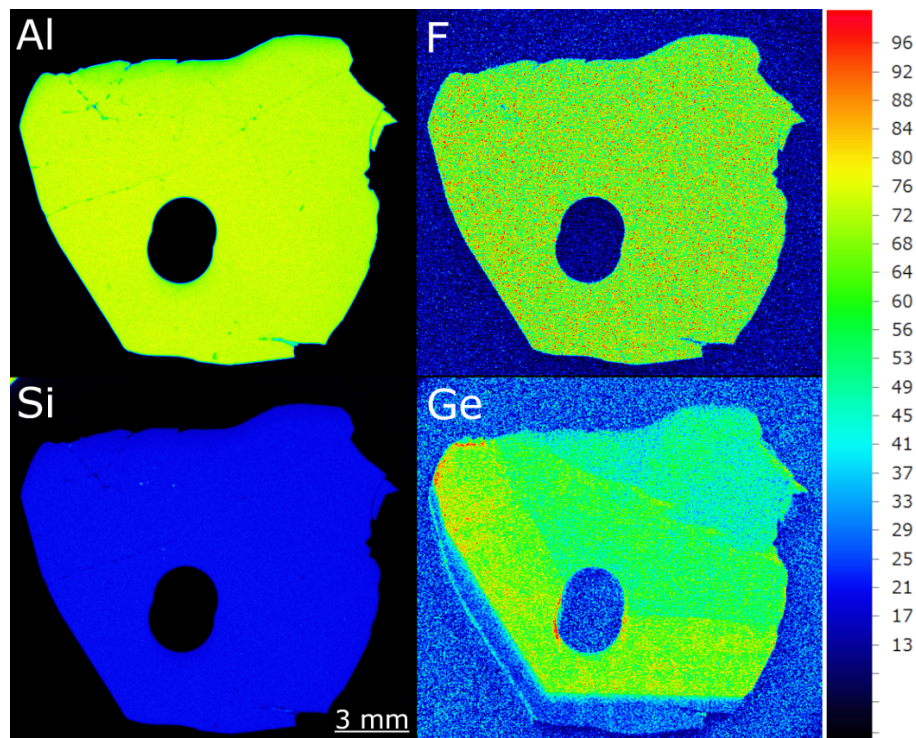

Fig. S2:  $\mu$ -XRF mapping of sample TopP (polished (001) face). Intensity scale is relative for each individual element. Pronounced growth zoning can be seen for Ge but no zoning is evident for Al, Si, or F. The Al mapping is sensitive to cracks and surface scratches. Note the substantially higher noise for F compared to the other elements. Noise on Ge is comparable to that on F, despite the concentration of the latter being about 1000 times higher, due to different XRF sensitivity and matrix absorption.

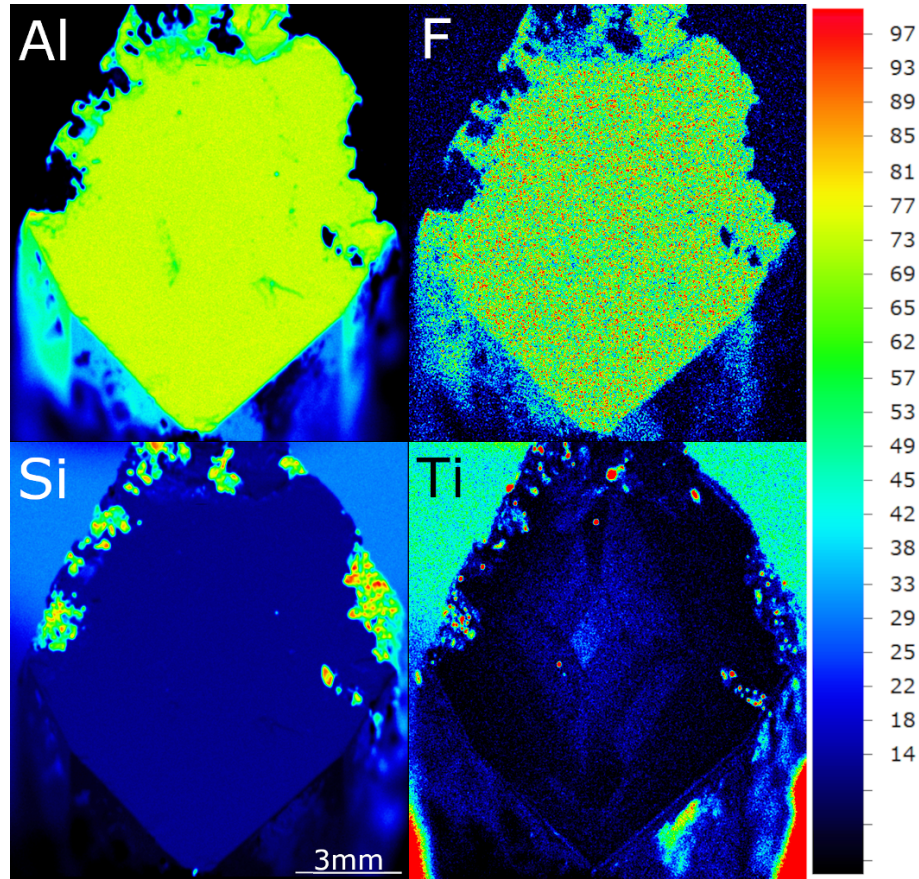

Fig. S3:  $\mu$ -XRF mapping of the (001) cleavage plane of sample TopT before removal of host-rock fragments and solid inclusions. Intensity scale is relative for each individual element. Growth and sector zoning can be seen for Ti but no zoning is evident for Al, Si, or F. The Al mapping is sensitive to cracks and surface unevenness of the cleavage plane. Note the substantially higher noise for F compared to the other elements.

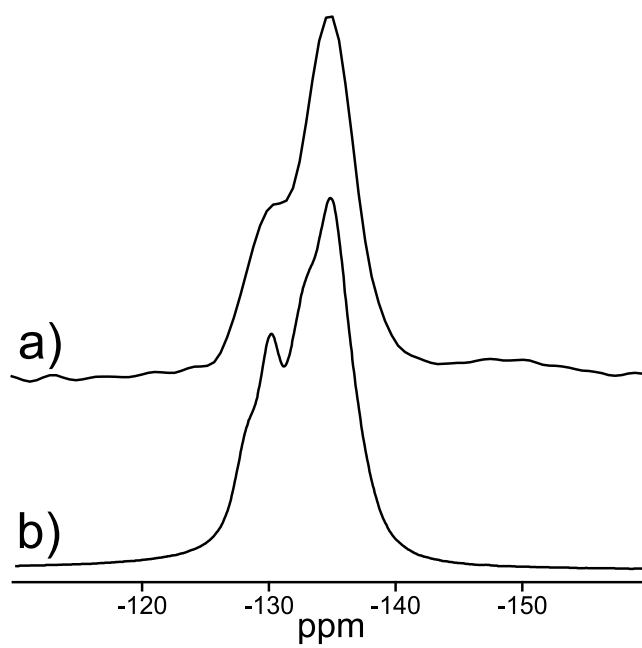

Fig. S4:  $^{19}\text{F}$  MAS NMR spectra ( $\nu_{\text{rot}} = 25$  kHz) relative to  $\text{CFCl}_3$  of two further commercially available samples: a) zharchikhite, b) topaz, Boa Vista, Brazil.

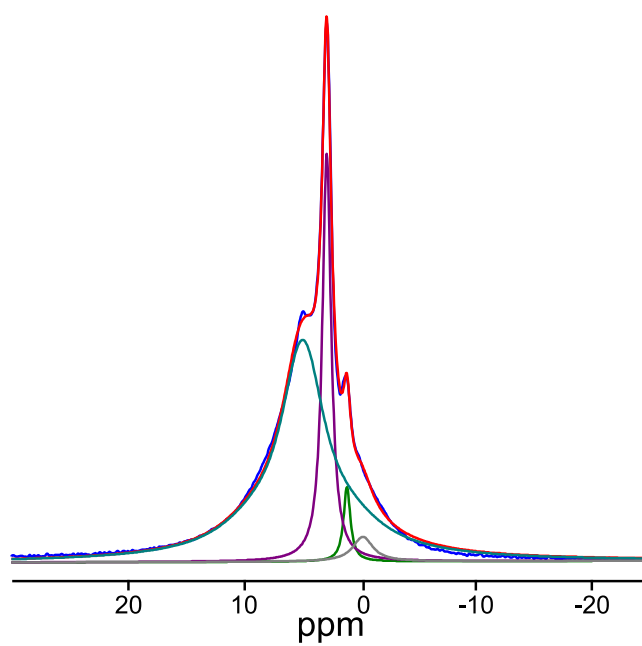

Fig. S5: Decomposition of the  $^1\text{H}$  MAS NMR spectrum of TopP, recorded with a recycle delay of 10 s ( $n_s = 128$ ); identification of four species: 4.9 ppm, 2.8 ppm, 1.1 ppm,  $-0.3$  ppm.
