# Supplementary material for: Studies on the local structure of the F ∕ OH site in topaz by magic angle spinning nuclear magnetic resonance and Raman spectroscopy
Source: Copernicus journal article supplement (doi:10.5194/ejm-34-507-2022), 2022-10-25
Supplement: Supplementary file 2 [file ejm-34-507-2022-supplement.zip]

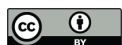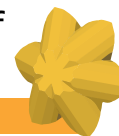

*Supplement of*

**Studies on the local structure of the F / OH site in topaz by magic angle spinning nuclear magnetic resonance and Raman spectroscopy**

**Anselm Loges et al.**

*Correspondence to:* Anselm Loges ([anselm.loges@fu-berlin.de](mailto:anselm.loges@fu-berlin.de))

- [ejm-34-507-2022-supplement-title-page.pdf](#)
- [TopP.cif](#)
- [TopT.cif](#)
- [Topaz\\_Supplement.pdf](#)

The copyright of individual parts of the supplement might differ from the article licence.
